# Supplementary material
Source: PubMed Central journal article supplement (PMC2913671)
Supplement: bbp056_2.pdf [file bbp056_2.pdf]

List of all available methods for MIRIAM Resources Web Services.

| Method                                                 | Description                                                                                                                                                               |
|--------------------------------------------------------|---------------------------------------------------------------------------------------------------------------------------------------------------------------------------|
| String checkRegExp(String identifier, String datatype) | Checks if the identifier given follows the regular expression of the data type (also provided)                                                                            |
| String[] getDataEntries(String nickname, String id)    | <b>Deprecated</b> , instead please use: getLocation(String nickname, String id)                                                                                           |
| String[] getDataEntries(String uri)                    | <b>Deprecated</b> , instead, please use: getLocation(String uri)                                                                                                          |
| String getDataEntry(String uri, String resource)       | <b>Deprecated</b> , instead, please use: getLocation(String uri, String resource)                                                                                         |
| String[] getDataResources(String nickname)             | Retrieves all the physical locations (URLs) of the services providing the data type (web page)                                                                            |
| String[] getDataTypeAllURIs(String name)               | <b>Deprecated</b> , instead, please use: getDataTypeURIs(String name)                                                                                                     |
| String getDataTypeDef(String nickname)                 | Retrieves the definition of a data type                                                                                                                                   |
| String getDataTypePattern(String nickname)             | Retrieves the pattern (regular expression) used by the identifiers within a data type                                                                                     |
| String[] getDataTypeSynonyms(String name)              | Retrieves all the synonym names of a data type (this list includes the original name)                                                                                     |
| String getDataTypeURI(String name, String type)        | <b>Deprecated</b> , instead, please use: getDataTypeURI(String name)                                                                                                      |
| String getDataTypeURI(String name)                     | Retrieves the unique (official) URI of a data type (example: "urn:miriam:uniprot")                                                                                        |
| String[] getDataTypeURIs(String name, String type)     | <b>Deprecated</b> , instead, please use: getDataTypeURIs(String name)                                                                                                     |
| String[] getDataTypeURIs(String name)                  | Retrieves all the URIs of a data type, including all the deprecated ones (examples: "urn:miriam:uniprot", "http://www.uniprot.org/", "urn:lsid:uniprot.org:uniprot", ...) |
| String getDataTypeURL(String name)                     | <b>Deprecated</b> , instead, please use: getDataTypeURI(String name)                                                                                                      |
| String[] getDataTypeURLs(String name)                  | <b>Deprecated</b> , instead, please use:                                                                                                                                  |

|                                                   |                                                                                                                                                                                                                                                                                        |
|---------------------------------------------------|----------------------------------------------------------------------------------------------------------------------------------------------------------------------------------------------------------------------------------------------------------------------------------------|
|                                                   | getDataTypeURIs(String name)                                                                                                                                                                                                                                                           |
| String getDataTypeURN(String name)                | <b>Deprecated</b> , instead, please use:<br>getDataTypeURI(String name)                                                                                                                                                                                                                |
| String[] getDataTypeURNs(String name)             | <b>Deprecated</b> , instead, please use:<br>getDataTypeURIs(String name)                                                                                                                                                                                                               |
| String[] getDataTypesId()                         | Retrieves the internal identifier (stable and perennial) of all the data types (for example: "MIR:00000005")                                                                                                                                                                           |
| String[] getDataTypesName()                       | Retrieves the list of names of all the data types available                                                                                                                                                                                                                            |
| String getJavaLibraryVersion()                    | Retrieves the latest version of the Java library available                                                                                                                                                                                                                             |
| String getLocation(String uri, String resource)   | Retrieves the physical location (URL) of a web page providing knowledge about a specific entity, using a specific resource                                                                                                                                                             |
| String[] getLocations(String nickname, String id) | Retrieves the physical locationS (URLs) of web pageS providing knowledge about an entity                                                                                                                                                                                               |
| String[] getLocations(String uri)                 | Retrieves the physical locationS (URLs) of web pageS providing knowledge about a specific entity                                                                                                                                                                                       |
| String getMiriamURI(String uri)                   | Transforms a MIRIAM URI into its official equivalent (to transform obsolete URIs into current valid ones). The parameter can be an obsolete URI (URN or URL), but the returned one will always be a URN. This process involve a percent-encoding of all reserved characters (like ':') |
| String getName(String uri)                        | Retrieves the common name of a data type                                                                                                                                                                                                                                               |
| String[] getNames(String uri)                     | Retrieves all the names (with synonyms) of a data type                                                                                                                                                                                                                                 |
| String getOfficialDataTypeURI(String uri)         | Retrieves the official URI (it will always be URN) of a data type corresponding to the deprecated one                                                                                                                                                                                  |
| String getOfficialURI(String uri)                 | <b>Deprecated</b> , instead, please use:<br>getOfficialDataTypeURI(String)                                                                                                                                                                                                             |
| String getResourceInfo(String id)                 | Retrieves the general information about a precise resource of a data type                                                                                                                                                                                                              |
| String getResourceInstitution(String id)          | Retrieves the institution which manages a resource                                                                                                                                                                                                                                     |

|                                                    |                                                                                                                    |
|----------------------------------------------------|--------------------------------------------------------------------------------------------------------------------|
|                                                    | (example: "European Bioinformatics Institute")                                                                     |
| String getLocation(String id)                      | Retrieves the location (or country) of a resource (example: "United Kingdom")                                      |
| String getServicesInfo()                           | Retrieves some information about these Web Services                                                                |
| String getServicesVersion()                        | Retrieves the current version of MIRIAM Web Services                                                               |
| String getURI(String name, String id, String type) | <b>Deprecated</b> , instead, please use: getURI(String name, String id)                                            |
| String getURI(String name, String id)              | Retrieves the unique URI of a specific entity (example: "urn:miriam:obo.go:GO%3A0045202")                          |
| String getURL(String name, String id)              | <b>Deprecated</b> , instead, please use: getURI(String name, String id)                                            |
| String getURN(String name, String id)              | <b>Deprecated</b> , instead, please use: getURI(String name, String id)                                            |
| String isDeprecated(String uri)                    | Says if a URI of a data type is deprecated                                                                         |
| Boolean isLibraryUpdated()                         | <b>Only available when using the Java library provided:</b> tests if the Java library used is the latest available |
