# Supplementary material
Source: PubMed Central journal article supplement (PMC2913671)
Supplement: bbp056_3.pdf [file bbp056_3.pdf]

List of all available methods for the Systems Biology Ontology (SBO) Web Services.

| <b>Method</b>                                                              | <b>Description</b>                                                                                                                      |
|----------------------------------------------------------------------------|-----------------------------------------------------------------------------------------------------------------------------------------|
| String getStringTermById(Integer identifier)                               | Retrieves the XML version of a term given its identifier                                                                                |
| String[] getStringTermsByIds(Integer[] identifiers)                        | Retrieves the list of terms (in XML) corresponding to the given identifiers                                                             |
| String[] getStringTree(Integer identifier)                                 | Retrieves the list of terms (in XML) contained in the subtree starting by the term corresponding to the given identifier                |
| <i>Term</i> getTermById(String identifier)                                 | Retrieves the term corresponding to the given identifier                                                                                |
| String getTermByIdOWL(Integer identifier)                                  | Retrieves the OWL version of a term, given its identifier                                                                               |
| <i>Term</i> [] getTermsByIds(Integer[] identifiers)                        | Retrieves the list of terms corresponding to the given identifiers                                                                      |
| String getTermsByIdsOWL(Integer[] identifiers)                             | Retrieves the OWL version of a list of terms, given their identifiers.                                                                  |
| <i>Term</i> [] getTree(Integer identifier)                                 | Retrieves the list of terms which compose the subtree starting with the term corresponding to the given identifier                      |
| String getTreeOWL(Integer identifier)                                      | Retrieves in the OWL format, the subtree starting from the term which identifier is given in parameter                                  |
| Boolean isDirectChildOf(Integer identifierChild, Integer identifierParent) | Checks if one term is a direct child of a second term                                                                                   |
| Boolean isChildOf(Integer identifierChild, Integer identifierParent)       | Checks if one term is a child (even indirect) of a second term                                                                          |
| Boolean isObsolete(Integer identifier)                                     | Checks if a term is obsolete or not, given its identifier                                                                               |
| Boolean isRoot(Integer identifier)                                         | Checks if a term is root or not, given its identifier                                                                                   |
| String sayHi(String sentence)                                              | Returns to the user the sentence he sent (for testing purposes)                                                                         |
| <i>Term</i> [] Search(String query)                                        | Global search on the whole content of the ontology                                                                                      |
| String searchOWL(String query)                                             | Retrieves the list of terms (in OWL) which related information (name, synonym, definition, comment, MathML) contain the given parameter |
| <i>Term</i> [] searchPossibleCompletions(String query)                     | Retrieves the list of terms which name contains the                                                                                     |

|                                                        |                                                                                                                                          |
|--------------------------------------------------------|------------------------------------------------------------------------------------------------------------------------------------------|
|                                                        | word(s) given in parameter                                                                                                               |
| <i>Term</i> searchPossibleCompletionsOWL(String query) | Retrieves the OWL version of the list of terms which name contains the word(s) given in parameter                                        |
| String[] searchString(String query)                    | Retrieves the list of terms (in XML) which related information (name, synonym, definition, comment, MathML) contains the given parameter |
| String[] searchStringPossibleCompletions(String query) | Retrieves the list of terms (in XML) which name contains the given parameter                                                             |
| String[] searchStringTermDetails(String query)         | Retrieves the list of terms (in XML) which details contain the given parameter                                                           |
| String[] searchStringTermMath(String query)            | Retrieves the list of terms (in XML) which MathML contain the given parameter                                                            |
| String[] searchStringTermName(String query)            | Retrieves the list of terms (in XML) which name contain the given parameter                                                              |
| String[] searchStringTermSynonyms(String query)        | Retrieves the list of terms (in XML) which synonym(s) contain the given parameter                                                        |
| <i>Term</i> searchTermDetails(String query)            | Searches for the occurrence(s) of the given parameter in the details (comment and definition) of terms from the whole ontology           |
| String searchTermDetailsOWL(String query)              | Retrieves the list of terms (in OWL) which details contain the given parameter                                                           |
| <i>Term</i> searchTermMath(String query)               | Searches for the occurrence(s) of the given parameter in the MathML of terms in the ontology                                             |
| String searchTermMathOWL(String query)                 | Retrieves the list of terms (in OWL) which MathML contain the given parameter                                                            |
| <i>Term</i> searchTermName(String query)               | Searches for the occurrence(s) of the given parameter in the name of terms of the ontology                                               |
| String searchTermNameOWL(String query)                 | Retrieves the list of terms (in OWL) which name contain the given parameter                                                              |
| <i>Term</i> searchTermSynonyms(String query)           | Retrieves the list of terms with a synonym containing the word(s) given in parameter                                                     |
| String searchTermSynonymsOWL(String query)             | Retrieves the list of terms (in OWL) which synonym contains the given parameter                                                          |
